# Supplementary material for: Gut Microbiota Structure of Dead Migratory Birds in Dali Nouer Lake, Chifeng City, China, based on Bacterial 16S rRNA Amplicon Sequencing
Source: Research Square preprint supplement (doi:10.21203/rs.3.rs-948511/v1), 2021-10-15
Supplement: Supplementary file 1 [file 434af27b41cbb081b89a4d33.xls]

## Sheet: Alpha diversity index
Alpha diversity index
Samples	Origin	Groups	Time	Clean reads	OTUs	Coverage	PD_Whole tree index	Chao 1 index	Shannon index	Simpson Index
A2G	Larus ridibundus, visceral organs	B	2018	61982	220	0.999	18.793	223.6	5.858	0.956
A2F	Larus ridibundus, visceral organs	B	2018	55643	178	0.998	19.809	316	2.766	0.724
A3C	Pluvialis squatarola, intestinal tracts	C	2018	56719	73	0.999	9.83	102.2	2.804	0.811
A3F	Pluvialis squatarola, visceral organs	B	2018	57277	280	0.999	25.995	326.077	4.182	0.873
A5G	Aythyini,	B	2018	61530	342	0.999	27.463	365.625	5.356	0.924
	visceral organs
A5F	Aythyini,	B	2018	55914	125	0.999	15.558	233.067	2.797	0.766
	visceral organs
A5C	Aythyini,	C	2018	57872	207	0.998	19.804	241.333	2.347	0.695
	intestinal tracts
A8G	Tadorna ferrginea, visceral organs	B	2018	64774	246	0.999	19.584	248.545	5.195	0.909
A8F	Tadorna ferrginea, visceral organs	B	2018	55464	222	0.999	16.083	249	5.615	0.951
A8C	Tadorna ferrginea, intestinal tracts	C	2018	55766	248	0.999	24.13	275	3.21	0.698
A11G	Anas poecilorhyncha, visceral organs	B	2018	58124	249	0.999	22.561	266.391	3.266	0.824
A11F	Anas poecilorhyncha, visceral organs	B	2018	63193	246	0.999	19.574	249.077	4.771	0.906
A11C	Anas poecilorhyncha, intestinal tracts	C	2018	60274	201	0.999	18.926	234.583	3.274	0.83
A12C	Aythyini,	C	2018	55013	299	0.999	24.563	303.903	4.939	0.912
	intestinal tracts
A13G	Aix galericulata, visceral organs	B	2018	57532	244	0.999	19.295	296.125	5.555	0.959
A13F	Aix galericulata, visceral organs	B	2018	61801	330	0.999	23.465	377.045	6.376	0.968
A13Y	Aix galericulata, visceral organs	B	2018	56972	124	0.999	13.05	135.333	0.803	0.142
A13C	Aix galericulata, intestinal tracts	C	2018	59227	271	0.999	22.517	288.375	3.423	0.773
A14G	Tadorna ferrginea, visceral organs	B	2018	57017	284	0.999	21.318	291.231	5.255	0.918
A14C	Tadorna ferrginea, intestinal tracts	C	2018	58623	217	0.999	20.869	246.527	2.432	0.684
A18C	Tadorna ferrginea, intestinal tracts	C	2018	58824	136	0.999	14.633	193.143	2.59	0.763
A19C	Tadorna ferrginea, intestinal tracts	C	2018	57973	391	0.998	33.261	432.176	5.813	0.957
H1C	Beihekou, Dali lake, aquatic plant	H	2018	58646	514	0.997	44.744	679.788	5.566	0.955
H2C	Nanhekou, Dali lake, aquatic plant	H	2018	56012	414	0.996	38.446	624.898	4.254	0.884
H3C	Ganggen lake,	H	2018	56892	805	0.997	66.919	877.532	7.359	0.986
	aquatic plant
H1S	Beihekou, water	S	2018	63704	807	0.997	64.38	835.718	7.379	0.987
H2S	Nanhekou, water	S	2018	62029	712	0.996	55.82	855.284	6.536	0.973
H3S	Ganggen lake, water	S	2018	62478	815	0.996	60.894	966.074	6.881	0.98
RS1.1	Larus ridibundus,	RS1.1	2019	14293	116	0.994	13.042	261.091	2.386	0.727
	feaces
RS1.2	Larus ridibundus,	RS1.2	2019	22662	85	0.997	8.135	95	1.807	0.623
	feaces
RS1.3	Larus ridibundus,	RS1.3	2019	19156	219	0.995	16.775	211.766	3.316	0.804
	feaces
RS2.1	Beihekou, water	RS2.1	2019	15721	234	0.995	22.538	242.025	4.585	0.91
RS2.2	water	RS2.2	2019	26449	301	0.992	21.28	291.936	2.489	0.653
RS2.3	Ganggen lake, water	RS2.3	2019	29696	443	0.989	33.565	439.889	3.658	0.736
RS2.4	Nanhekou, water	RS2.4	2019	15817	440	0.99	32.506	450.808	4.843	0.848
RS3.1	Nanhekou,	RS3.1	2019	48599	645	0.984	35.937	594.72	4.349	0.783
	aquatic plant
